# Supplementary material for: Tobacco Price Increase and Smoking Cessation in Japan, a Developed Country With Affordable Tobacco: A National Population-Based Observational Study
Source: PubMed Central journal article supplement (PMC4690736; doi:10.2188/jea.je20140183), 2016-01-05
Supplement: je-26-014-s001.pdf [file je-26-014-s001.pdf]

**eTable 1.** Number (prevalence) of current smokers at June according to basic characteristics of total subjects

| Characteristics           | Men             |                 |                                  | Women           |                 |                                  |
|---------------------------|-----------------|-----------------|----------------------------------|-----------------|-----------------|----------------------------------|
|                           | 2007<br>n=2,639 | 2010<br>n=2,598 | p for<br>difference <sup>a</sup> | 2007<br>n=2,995 | 2010<br>n=2,856 | p for<br>difference <sup>a</sup> |
| Current smoker at June    | 1080 (40.9)     | 961 (37.0)      | 0.004                            | 355 (11.9)      | 306 (10.7)      | 0.173                            |
| Other household smoker(s) |                 |                 |                                  |                 |                 |                                  |
| 0 smoker                  | 733 (36.8)      | 639 (31.8)      | 0.001                            | 147 (8.5)       | 130 (7.1)       | 0.133                            |
| 1 or more                 | 347 (53.7)      | 322 (54.6)      | 0.775                            | 208 (16.6)      | 176 (17.3)      | 0.653                            |
| Household expenditure     |                 |                 |                                  |                 |                 |                                  |
| 1st (lowest) tertile      | 335 (44.3)      | 293 (36.8)      | 0.003                            | 115 (14.5)      | 98 (11.8)       | 0.097                            |
| 2nd tertile               | 338 (42.3)      | 316 (38.1)      | 0.085                            | 104 (10.8)      | 99 (11.0)       | 0.941                            |
| 3rd (highest) tertile     | 338 (36.7)      | 307 (35.7)      | 0.719                            | 108 (9.7)       | 94 (9.3)        | 0.812                            |
| Missing                   | 69 (38.8)       | 45 (38.8)       | 1.000                            | 28 (14.6)       | 15 (10.9)       | 0.408                            |
| Age group                 |                 |                 |                                  |                 |                 |                                  |
| 20-39                     | 378 (53.8)      | 317 (44.0)      | 0.000                            | 149 (16.9)      | 122 (15.9)      | 0.594                            |
| 40-59                     | 459 (45.7)      | 397 (42.7)      | 0.184                            | 151 (13.3)      | 130 (12.6)      | 0.654                            |
| 60-79                     | 243 (26.1)      | 247 (26.1)      | 1.000                            | 55 (5.6)        | 54 (5.1)        | 0.624                            |
| Home owner                |                 |                 |                                  |                 |                 |                                  |
| No                        | 226 (48.5)      | 226 (45.0)      | 0.302                            | 118 (21.8)      | 97 (17.7)       | 0.094                            |
| Yes                       | 854 (39.3)      | 735 (35.1)      | 0.004                            | 237 (9.7)       | 209 (9.1)       | 0.486                            |
| Employment status         |                 |                 |                                  |                 |                 |                                  |
| Working                   | 926 (44.7)      | 811 (40.9)      | 0.017                            | 239 (14.5)      | 197 (12.9)      | 0.197                            |
| Not working               | 142 (27.0)      | 136 (24.2)      | 0.330                            | 113 (8.5)       | 107 (8.2)       | 0.779                            |
| Missing                   | 12 (30.0)       | 14 (25.0)       | 0.645                            | 3 (12.5)        | 2 (6.7)         | 0.646                            |
| Marital status            |                 |                 |                                  |                 |                 |                                  |
| Married                   | 834 (39.8)      | 710 (36.4)      | 0.030                            | 226 (10.4)      | 198 (9.6)       | 0.442                            |
| Never married             | 191 (45.3)      | 201 (38.7)      | 0.046                            | 69 (15.9)       | 57 (14.6)       | 0.629                            |
| Widowed/Divorced          | 55 (45.8)       | 50 (38.8)       | 0.304                            | 60 (15.7)       | 51 (12.4)       | 0.219                            |
| Poor self-rated health    |                 |                 |                                  |                 |                 |                                  |
| No                        | 914 (42.1)      | 826 (38.3)      | 0.010                            | 281 (11.5)      | 254 (11.0)      | 0.551                            |
| Yes                       | 129 (36.3)      | 97 (30.2)       | 0.103                            | 62 (14.4)       | 44 (10.4)       | 0.078                            |
| Missing                   | 37 (32.5)       | 38 (32.2)       | 1.000                            | 12 (9.2)        | 8 (7.0)         | 0.642                            |

<sup>a</sup>calculated by Fisher's exact test.
